# Supplementary material
Source: publisher figshare collection journal article supplement (https://acs.figshare.com/ndownloader/files/3769426)
Supplement: Supplementary file 1 [file 3769426]

## Supporting Information

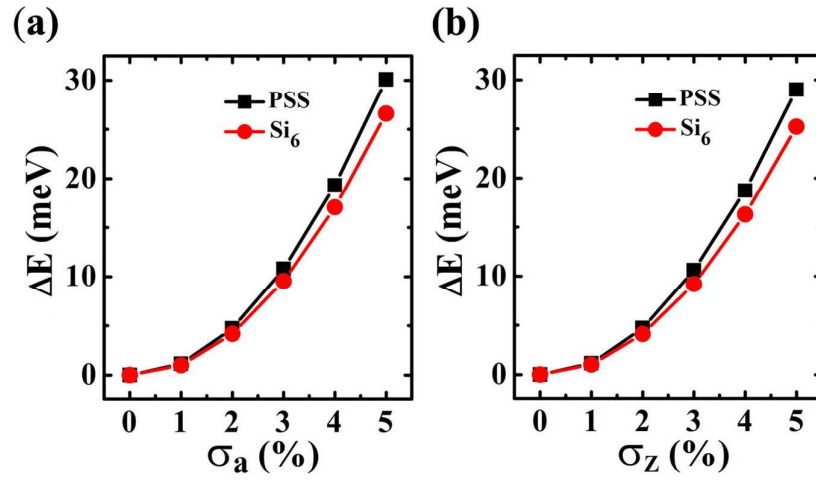

**Figure S1.** The evolutions of deformation potential versus the applied strain for both (3,3) PSS and  $\text{Si}_6$ -antidot patterned (3,3) superlattice. The (a) and (b) are for the strains  $\sigma_a$  and  $\sigma_z$ , respectively.

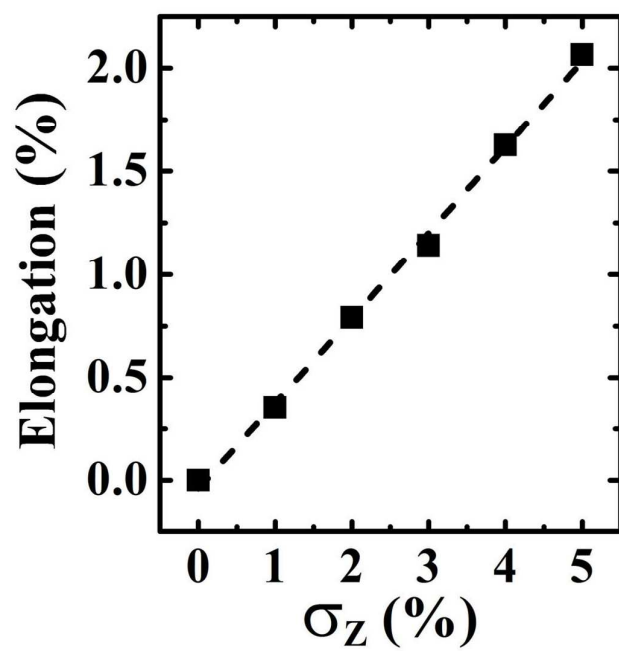

**Figure S2.** The elongation of Si-Si bonds along zigzag edge as referred to the ones without strain versus the applied strain  $\sigma_z$ .

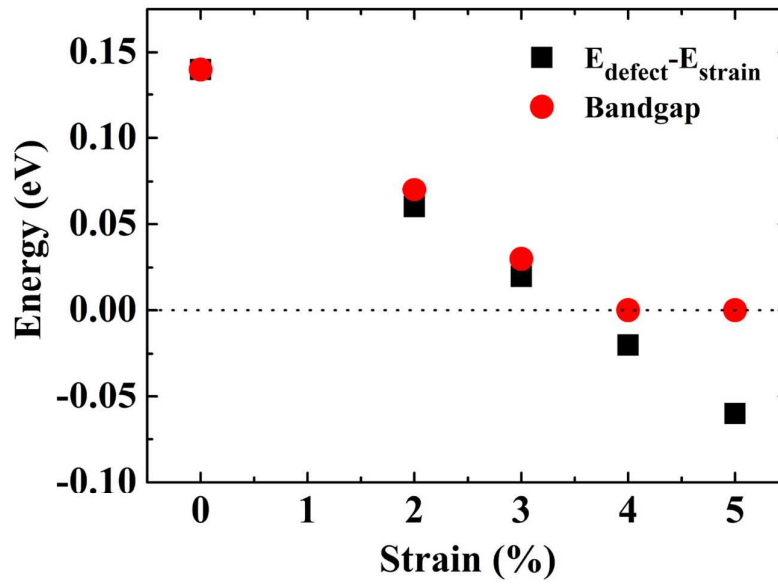

**Figure S3.** The evolutions of bandgap and  $E_{\text{defect}} - E_{\text{strain}}$  versus the applied uniaxial strain for the  $\text{Si}_6$ -antidot patterned (6,6) superlattice. Note that the bandgap would be closed once the  $E_{\text{defect}}$  gets smaller than  $E_{\text{strain}}$ .

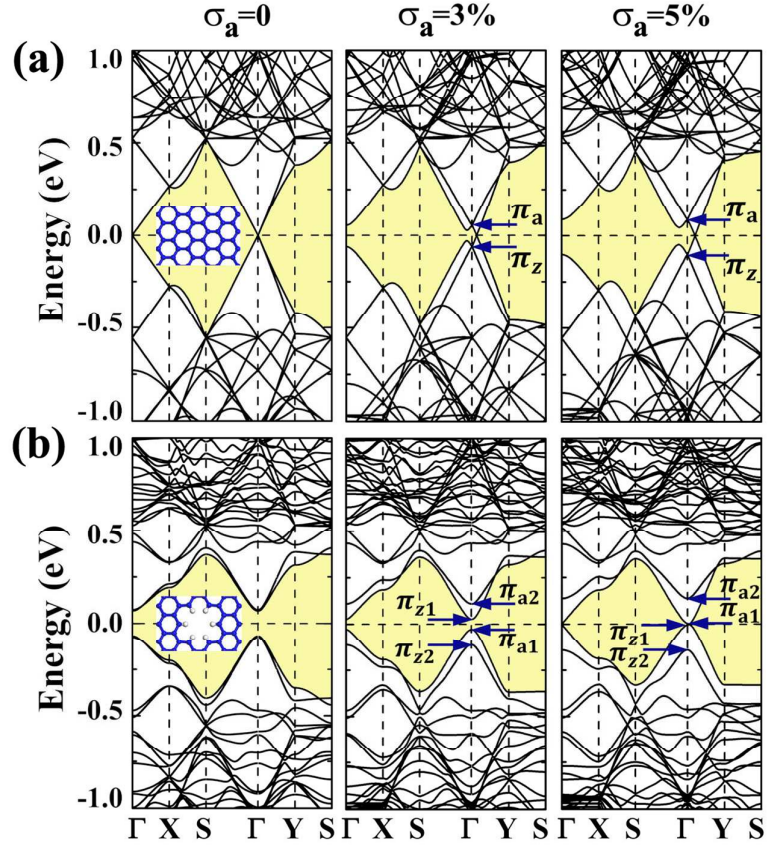

**Figure S4.** The calculated energy bandstructures for (6,6) PSS (a) and Si<sub>6</sub>-antidot patterned (6,6) silicene superlattice (b) under 0%, 3%, and 5%  $\sigma_a$  strains, respectively.
